# Supplementary material for: Association of body mass index and hypoglycemia with mortality rates among sepsis patients: a retrospective sub-analysis of the FORECAST Study
Source: Research Square preprint supplement (doi:10.21203/rs.3.rs-643582/v1), 2021-06-30
Supplement: Supplementary file 1 [file 5e93fc803acd9f5e68854924.docx]

**Appendix: The core investigators FORECAST Study**

Satoshi Gando 1, 2), Yasuhiro Otomo 3), Shigeki Kushimoto 4), Hiroshi Ogura 5), Seitaro Fujishima 6), Atsushi Shiraishi 7), Daizoh Saitoh 8), Toshihiko Mayumi 9), Kiyotsugu Takuma 10), Taka-aki Nakada 11), Yasukazu Shiino 12), Takehiko Tarui 13), Toru Hifumi 14), Kohji Okamoto 15), Yutaka Umemura 16), Joji Kotani 17), Yuichiro Sakamoto 18), Junichi Sasaki 19), Shin-ichiro Shiraishi 20), Ryosuke Tsuruta 21), Akiyoshi Hagiwara 22), Toshikazu Abe 23, 24, 25), Kazuma Yamakaw 26), Tomohiko Masuno 27), Naoshi Takeyama 28), Norio Yamashita 29), Hiroto Ikeda 30), Masashi Ueyama 31)

1) Division of Acute and Critical Care Medicine, Hokkaido University, Sapporo, Japan

2) Critical Care Medicine, Sapporo Higashi Tokushukai Hospital, Sapporo, Japan

3) Trauma and Acute Critical Care Center, Medical Hospital, Tokyo Medical and Dental University, Tokyo, Japan

4) Division of Emergency and Critical Care Medicine, Tohoku University Graduate School of Medicine, Sendai, Japan

5) Department of Traumatology and Acute Critical Medicine, Osaka University Graduate School of Medicine, Osaka, Japan

6) Center for General Medicine Education, Keio University School of Medicine, Tokyo, Japan

7) Emergency and Trauma Center, Kameda Medical Center, Kamogawa, Japan

8) Division of Traumatology, Research Institute, National Defense Medical College, Tokorozawa, Japan

9) Department of Emergency Medicine, School of Medicine, University of Occupational and Environmental Health, Kitakyushu, Japan

10) Emergency & Critical Care Center, Kawasaki Municipal Kawasaki Hospital, Kawasaki, Japan

11) Department of Emergency and Critical Care Medicine, Chiba University Graduate School of Medicine, Chiba, Japan

12) Department of Acute Medicine, Kawasaki Medical School, Kurashiki, Japan

13) Department of Trauma and Critical Care Medicine, Kyorin University School of Medicine, Tokyo, Japan

14) Department of Emergency and Critical Care Medicine, St. Luke’s International Hospital, Tokyo, Japan

15) Department of Surgery, Center for Gastroenterology and Liver Disease, Kitakyushu City Yahata Hospital, Kitakyushu, Japan

16) Department of Disaster and Emergency Medicine, Kobe University Graduate School of Medicine, Kobe, Japan

17) Department of Traumatology and Acute Critical Medicine, Osaka University Graduate School of Medicine, Osaka, Japan

18) Emergency and Critical Care Medicine, Saga, University Hospital, Saga, Japan

19) Department of Emergency and Critical Care Medicine, Keio University School of Medicine, Tokyo, Japan

20) Department of Emergency and Critical Care Medicine, Aizu Chuo Hospital, Aizuwakamatsu, Japan

21) Advanced Medical Emergency & Critical Care Center, Yamaguchi, Ube, Japan

22) Department of Emergency Medicine, Niizashiki Chuo General Hospital, Niiza, japan

23) Department of General Medicine, Juntendo University, Tokyo, Japan

24) Health Services Research and Development Center, University of Tsukuba, Tsukuba, Japan

25) Department of Health Services Research, Faculty of Medicine, University of Tsukuba, Tsukuba, Japan

26) Division of Trauma and Surgical Critical Care, Osaka, General Medical Center, Osaka, Japan

27) Department of Emergency and Critical Care Medicine, Nippon Medical School, Tokyo, Japan

28) Advanced Critical Care Center, Aichi Medical University Hospital, Nagakute, Japan

29) Advanced Emergency medical Service Center, Kurume University Hospital, Kurume, Japan

30) Department of Emergency Medicine, Teikyo University School of Medicine, Tokyo, Japan

31) Department of Trauma, Critical Care Medicine, and Burn Center, Japan Community Healthcare Organization, Chukyo Hospital
