# Supplementary material for: Association of body mass index and hypoglycemia with mortality rates among sepsis patients: a retrospective sub-analysis of the FORECAST Study
Source: Research Square preprint supplement (doi:10.21203/rs.3.rs-643582/v1), 2021-06-30
Supplement: Supplementary file 2 [file 4b68bd135d7021cec6850d57.docx]

**Supplemental Digital Content 2.** **Detailed clinical outcomes in patients with or without hypoglycemia classified by body mass index**

|  | All patients | BMI low (n=223) | |  | BMI normal (n=622) | |  | BMI high (n=258) | |  |
| --- | --- | --- | --- | --- | --- | --- | --- | --- | --- | --- |
|  | (n=1,103) | Glucose  <70 mg/dL | Glucose  ≥70 mg/dL | *p* value | Glucose  <70 mg/dL | Glucose  ≥70 mg/dL | *p* value | Glucose  <70 mg/dL | Glucose  ≥70 mg/dL | *p* value |
|  |  | (n=13) | (n=210) |  | (n=38) | (n=584) |  | (n=14) | (n=244) |  |
| In-hospital mortality | 253/1103 (22.9) | 3/13 (23.1) | 53/210 (25.2) | 0.862 | 18/38 (47.4) | 119/584 (20.4) | 0.0001 | 3/14 (21.4) | 57/244 (23.4) | 0.868 |
| 28-day mortality | 200/1093 (18.3) | 3/13 (23.1) | 43/209 (20.6) | 0.829 | 16/38 (42.1) | 89/577 (15.4) | <.0001 | 3/14 (21.4) | 46/242 (19.0) | 0.823 |
| Survivor dispositions | (n=850) | (n=10) | (n=157) |  | (n=20) | (n=465) |  | (n=11) | (n=187) |  |
| Home | 314 (36.9) | 3 (30.0) | 47 (29.9) | 0.997 | 4 (20.0) | 176 (37.8) | 0.106 | 1 (9.1) | 83 (44.4) | 0.021 |
| Transfer | 536 (63.1) | 7 (70,0) | 110 (70.1) |  | 16 (80.0) | 289 (62.2) |  | 10 (90.9) | 104 (55.6) |  |
| ICU-free days | 19 (11–24) | 16.5 (10–24) | 20 (13–25) | 0.355 | 17 (9.5–22) | 19 (10–24) | 0.437 | 13 (4–20) | 20 (11–24) | 0.097 |
| Ventilator-free days | 21 (0–28) | 22 (2–26.5) | 22 (0–28) | 0.815 | 10 (0–25) | 21 (0–28) | 0.0105 | 16.5 (0–28) | 20 (0–28) | 0.746 |
| Length of hospital stay | 24 (12–46) | 22 (5.5–40) | 24 (14–45) | 0.524 | 27 (4–44) | 25.5 (13–47) | 0.260 | 23.5 (19–52.5) | 21 (11–46) | 0.200 |

Number of patients with missing data: 28-day mortality, 10; ICU-free days, 210; ventilator-free days, 8

BMI, body mass index; ICU, intensive care unit
